# Supplementary material for: Dimensions of Oppositional Defiant Disorder in Young Children: Model Comparisons, Gender and Longitudinal Invariance
Source: Springer Nature journal article supplement (doi:10.1007/s10802-014-9919-0), 2014-08-12
Supplement: MOESM1 [file 542442]

Supplemental Table 1 *Correlations between manifest indicators*

|  | 1 | 2 | 3 | 4 | 5 | 6 | 7 | 8 | 15 |  | 16 | 17 | 18 | 19 | 20 | 21 |
| --- | --- | --- | --- | --- | --- | --- | --- | --- | --- | --- | --- | --- | --- | --- | --- | --- |
| 1. Touchy: age 4 | 1 |  |  |  |  |  |  |  |  |  |  |  |  |  |  |  |
| 2. Angry: age 4 | .64** | 1 |  |  |  |  |  |  |  |  |  |  |  |  |  |  |
| 3. Get even: age 4 | .41** | .46** | 1 |  |  |  |  |  |  |  |  |  |  |  |  |  |
| 4. Temper: age 4 | .43** | .47** | .39** | 1 |  |  |  |  |  |  |  |  |  |  |  |  |
| 5. Argues: age 4 | .36** | .35** | .27** | .50** | 1 |  |  |  |  |  |  |  |  |  |  |  |
| 6. Defies: age 4 | .40** | .42** | .43** | .48** | .52** | 1 |  |  |  |  |  |  |  |  |  |  |
| 7. Annoys: age 4 | .38** | .36** | .52** | .37** | .30** | .47** | 1 |  |  |  |  |  |  |  |  |  |
| 8. Blames: age 4 | .30** | .29** | .37** | .28** | .23** | .31** | .35** | 1 |  |  |  |  |  |  |  |  |
| 15. Touchy: age 5 | .40** | .36** | .25** | .25** | .19** | .29** | .17** | .19** | 1 |  |  |  |  |  |  |  |
| 16. Angry: age 5 | .30** | .35** | .24** | .25** | .17** | .23** | .16** | .13** | .54** |  | 1 |  |  |  |  |  |
| 17. Get even: age 5 | .20** | .29** | .40** | .27** | .21** | .26** | .34** | .25** | .30** |  | .38** | 1 |  |  |  |  |
| 18. Temper: age 5 | .28** | .26** | .24** | .48** | .34** | .30** | .22** | .15** | .31** |  | .35** | .27** | 1 |  |  |  |
| 19. Argues: age 5 | .23** | .23** | .18** | .34** | .43** | .31** | .19** | .08* | .21** |  | .32** | .25** | .57** | 1 |  |  |
| 20. Defies: age 5 | .27** | .29** | .26** | .34** | .36** | .42** | .28** | .22** | .24** |  | .28** | .35** | .43** | .51** | 1 |  |
| 21. Annoys: age 5 | .21** | .20** | .28** | .23** | .16** | .26** | .42** | .19** | .30** |  | .30** | .45** | .30** | .26** | .34** | 1 |
| 22. Blames: age 5 | .14** | .17** | .21** | .22* | .16** | .22** | .26** | .37** | .30** |  | .33* | .35** | .23** | .20** | .27** | .34** |
| 29. Touchy: age 6-7 | .30** | .29** | .23** | .28** | .18** | .21** | .20** | .15** | .40** |  | .34** | .26** | .25** | .20* | .23** | .22** |
| 30. Angry: age 6-7 | .30** | .37** | .26** | .32** | .25** | .25** | .22** | .14** | .34** |  | .39** | .27** | .29** | .25** | .28** | .24** |
| 31. Get even: age 6-7 | .20** | .21** | .37** | .26** | .20** | .27** | .30** | .29** | .27** |  | .28** | .49** | .24** | .22** | .29** | .34** |
| 32. Temper: age 6-7 | .28** | .30** | .26** | .50** | .36** | .38** | .29** | .20** | .29** |  | .27** | .32** | .50** | .41** | .37** | .32** |
| 33. Argues: age 6-7 | .21** | .23** | .20** | .33** | .41** | .31** | .21** | .12** | .20** |  | .22** | .24** | .40** | .53** | .38** | .22** |
| 34. Defies: age 6-7 | .24** | .28** | .28** | .33** | .30** | .40** | .25** | .21** | .21** |  | .25** | .34** | .33** | .36** | .51** | .25** |
| 35. Annoys: age 6-7 | .19** | .18** | .28** | .23** | .20** | .25** | .38** | .22*** | .23** |  | .16** | .34** | .22** | .24** | .28** | .49** |
| 36. Blames: age 6-7 | .21** | .20** | .20** | .26** | .22** | .24** | .25** | .34** | .18** |  | .15** | .30** | .26** | .24** | .25** | .24** |

Supplemental Table 1 (cont)

|  | 22 | 29 | 30 | 31 | 32 | 33 | 34 | 35 | 36 |
| --- | --- | --- | --- | --- | --- | --- | --- | --- | --- |
| 22. Blames: age 5 | 1 |  |  |  |  |  |  |  |  |
| 29. Touchy: age 6-7 | .21** | 1 |  |  |  |  |  |  |  |
| 30. Angry: age 6-7 | .20** | .34** | 1 |  |  |  |  |  |  |
| 31. Get even: age 6-7 | .25** | .30** | .38** | 1 |  |  |  |  |  |
| 32. Temper: age 6-7 | .24** | .40** | .41** | .40** | 1 |  |  |  |  |
| 33. Argues: age 6-7 | .17** | .32** | .32** | .34** | .56** | 1 |  |  |  |
| 34. Defies: age 6-7 | .23** | .32** | .34** | .42** | .51** | .55** | 1 |  |  |
| 35. Annoys: age 6-7 | .23** | .29** | .34** | .43** | .36** | .39** | .40** | 1 |  |
| 36. Blames: age 6-7 | .40** | .28** | .24** | .37** | .34** | .31** | .33** | .39** | 1 |

Note: *P < .05; **P < .01

Supplemental Table 2. Correlations among the Pitt-2 ODD factors within and across age for boys (above diagonal) and girls (below diagonal)

|  | Age 4  ------------------------------ | | Age 5  ------------------------------ | | Age 6-7  ------------------------------ | |
| --- | --- | --- | --- | --- | --- | --- |
|  | ODD Beh  ------------- | ODD NA  ------------- | ODD Beh  ------------- | ODD NA  ------------- | ODD Beh  ------------- | ODD NA  ------------- |
| Age 4: |  |  |  |  |  |  |
| ODD Beh1 | 1.00 | **.82** | .70 | .52 | .67 | .51 |
| ODD NA1 | **.66** | 1.00 | .51 | .59 | .48 | .49 |
| Age 5: |  |  |  |  |  |  |
| ODD Beh2 | .61 | .39 | 1.00 | **.57** | .71 | .48 |
| ODD NA2 | .39 | .55 | **.61** | 1.00 | .47 | .66 |
| Age 6-7: |  |  |  |  |  |  |
| ODD Beh3 | .63 | .41 | .72 | .48 | 1.00 | **.66** |
| ODD NA3 | .44 | .51 | .47 | .59 | **.67** | 1.00 |

*Note*. ODD Beh = ODD Behavior factor. ODD NA = ODD Negative Affect factor. Correlations are from a six-factor confirmatory factor analysis run separately for boys and girls via LISREL 8 (Jöreskog & Sörbom, 2006), allowing the unique variance in each measured ODD item at each wave to correlate with the unique variance in the same item at the other two waves. Factor correlations for boys (*N* = 391) are tabled above the diagonal; factor correlations for girls (*N* = 405) are tabled below the diagonal. All correlations are statistically significant at two-tailed *p* < .0001. Factor correlations within age are bolded.

| **Supplemental Table 3. Completely Standardized Factor Loadings for the Pitt-2 model** | | | | | |  |
| --- | --- | --- | --- | --- | --- | --- |
|  | **Age 4** |  | **Age 5** |  | **Age 6** |  |
|  | **ODD-B** | **ODD NA** | **ODD-B** | **ODD NA** | **ODD-B** | **ODD NA** |
| **Boys** |  |  |  |  |  |  |
| Temper | 0.71 |  | 0.68 |  | 0.76 |  |
| Argues | 0.71 |  | 0.78 |  | 0.75 |  |
| Defies | 0.73 |  | 0.64 |  | 0.68 |  |
| Touchy |  | 0.79 |  | 0.71 |  | 0.75 |
| Angry |  | 0.8 |  | 0.76 |  | 0.82 |
| Spiteful |  | 0.62 |  | 0.5 |  | 0.58 |
| **Girls** |  |  |  |  |  |  |
| Temper | 0.73 |  | 0.76 |  | 0.75 |  |
| Argues | 0.65 |  | 0.76 |  | 0.74 |  |
| Defies | 0.68 |  | 0.64 |  | 0.72 |  |
| Touchy |  | 0.74 |  | 0.6 |  | 0.66 |
| Angry |  | 0.83 |  | 0.85 |  | 0.71 |
| Spiteful |  | 0.54 |  | 0.47 |  | 0.65 |
| **Combined sexes** |  |  |  |  |  |  |
| Temper | 0.72 |  | 0.76 |  | 0.76 |  |
| Argues | 0.68 |  | 0.77 |  | 0.74 |  |
| Defies | 0.71 |  | 0.64 |  | 0.7 |  |
| Touchy |  | 0.77 |  | 0.65 |  | 0.7 |
| Angry |  | 0.81 |  | 0.8 |  | 0.77 |
| Spiteful |  | 0.58 |  | 0.49 |  | 0.61 |
